# Supplementary material for: Mesona chinensis Extract Ameliorates Retinal Angiopathy in a Zebrafish Model of Diabetic Retinopathy by Targeting Thymidylate Synthase in Folate Metabolism
Source: Research Square preprint supplement (doi:10.21203/rs.3.rs-8091004/v1), 2025-11-26
Supplement: Supplementary file 1 [file 8444c55f86c2a9f54f1d6368.docx]

**(Supplementary Data)**


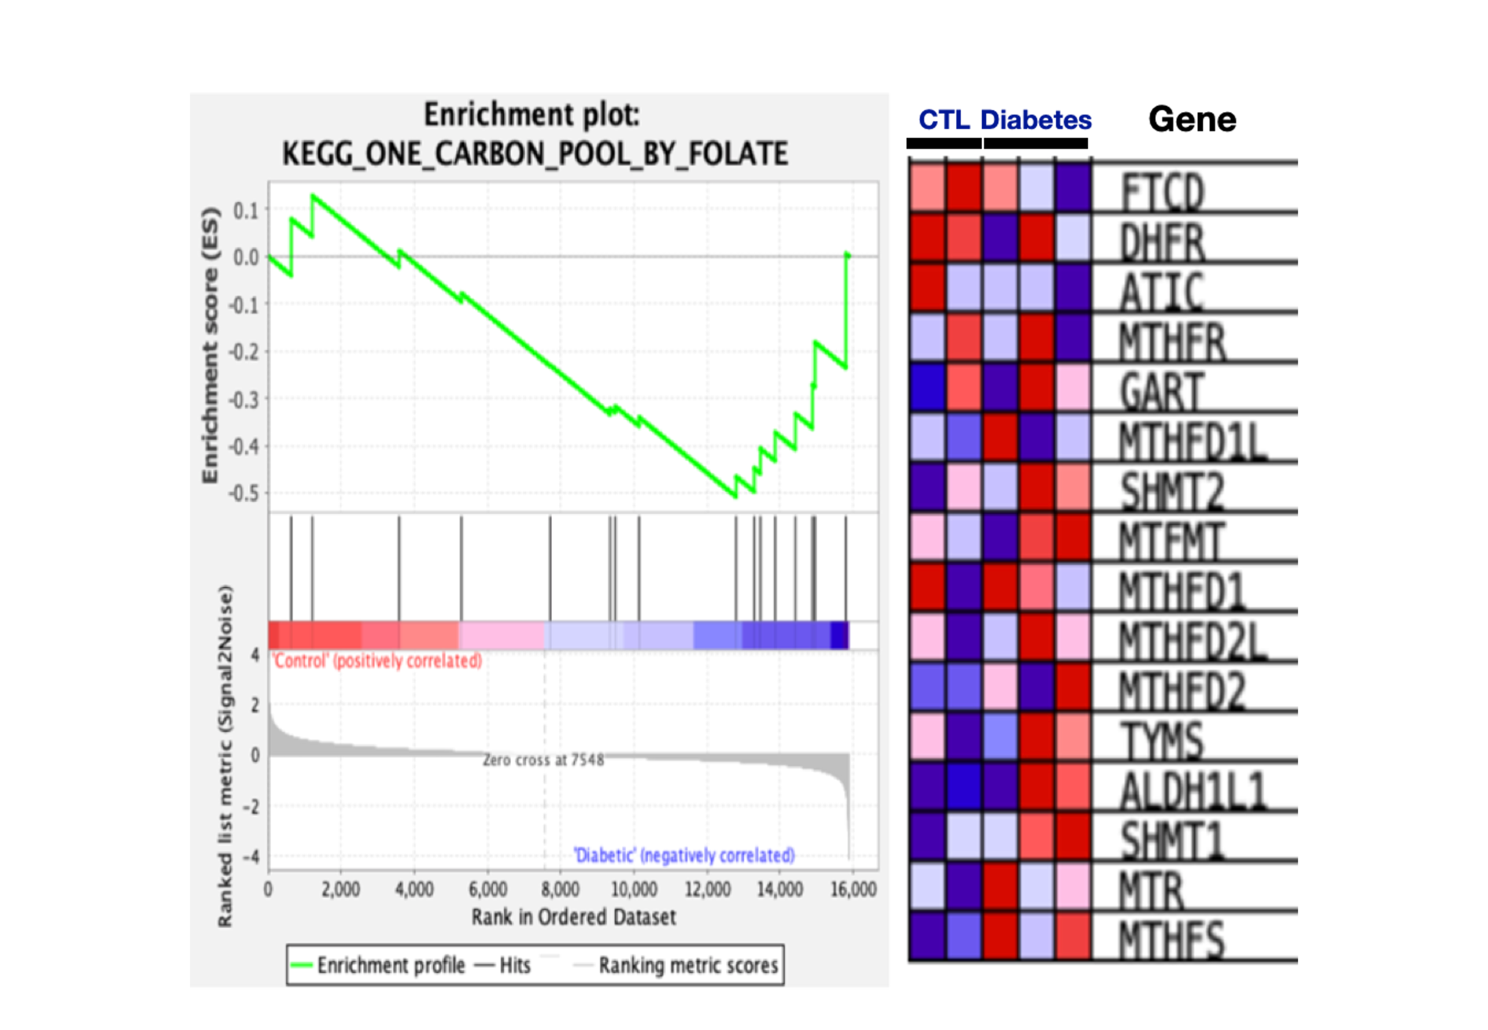


**Figure S1**

**The mRNA expression of one-carbon metabolism-associated genes is upregulated in the retina of diabetic mice.**

Microarray data from diabetic mouse retinas were analyzed by gene set enrichment analysis (GSEA). The GSEA plot and heat map demonstrated the enrichment of one-carbon pool genes in the diabetic group.


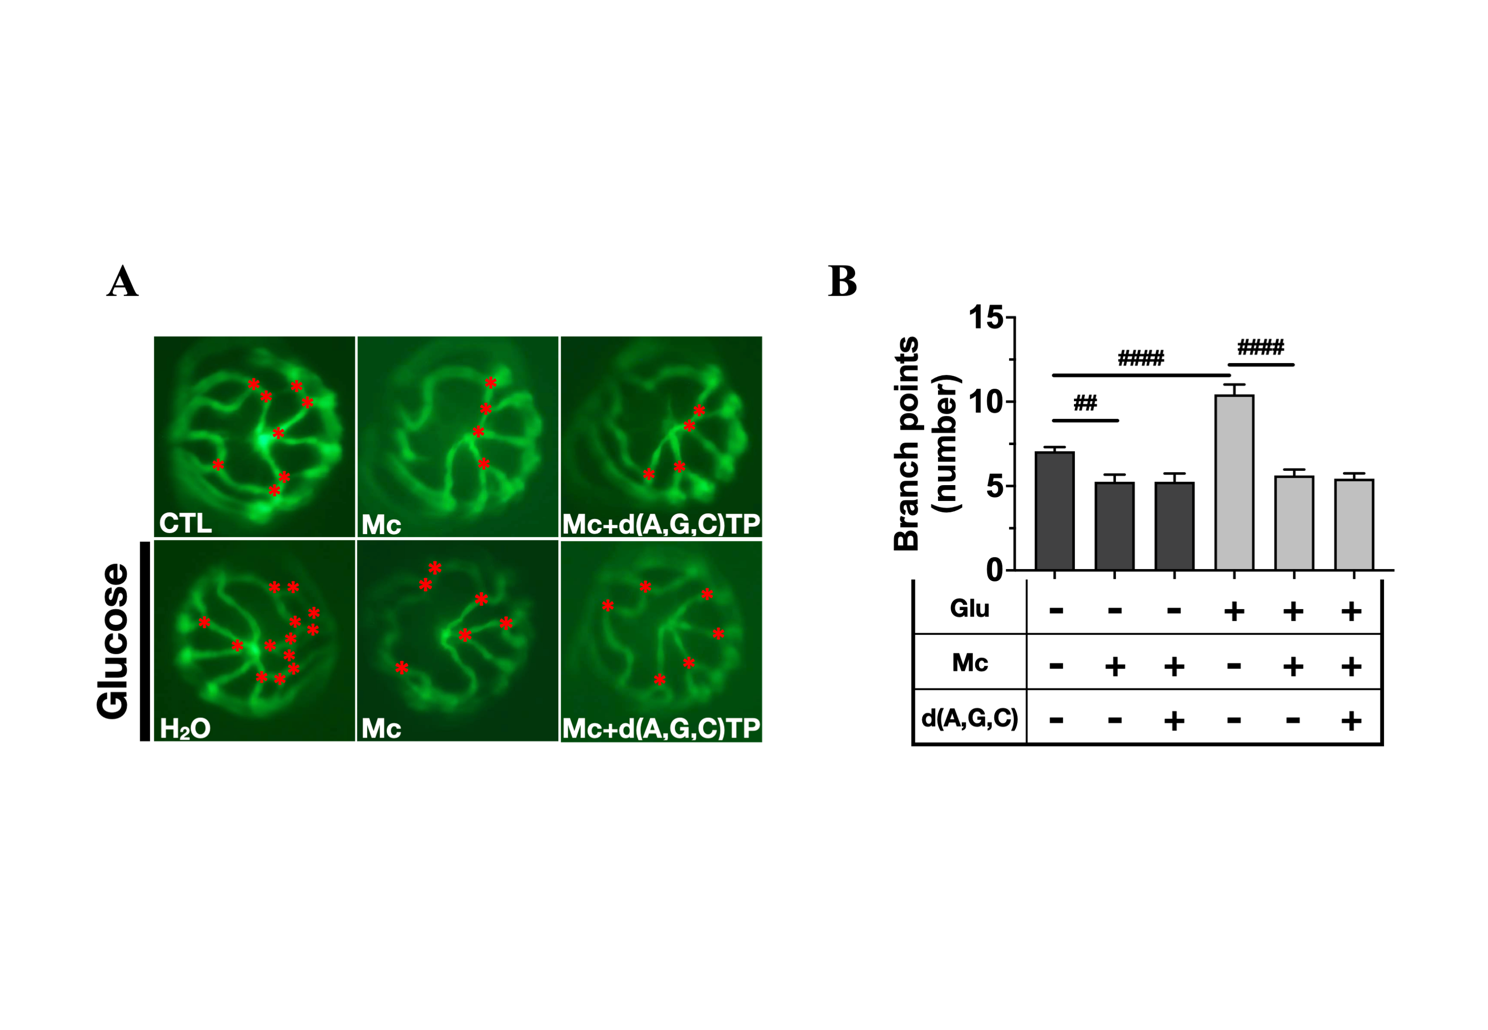


**Figure S2**

**The anti-angiogenic activity of *M. chinensis* is not affected by a mixed nucleotide solution of dATP, dGTP, and dCTP.**

**A-B.** Larvae were exposed to *M. chinensis* (0.9 mg/ml) and/or a mixed nucleotide solution, d(A,G,C)TP (50 μM), with or without glucose (100 mM) from 2 to 6 dpf. The number of retinal hyaloid vessel branch points was assessed at 6 dpf. d(A,G,C)TP is a mixed solution of dATP, dGTP, and dCTP. Sample sizes ranged from 12 to 16 embryos per group. Statistical significance was calculated by Student’s t-test. ##, p < 0.01. ####, p < 0.0001. d(A,G,C)TP, a mixed nucleotide solution containing dATP, dGTP, and dCTP.


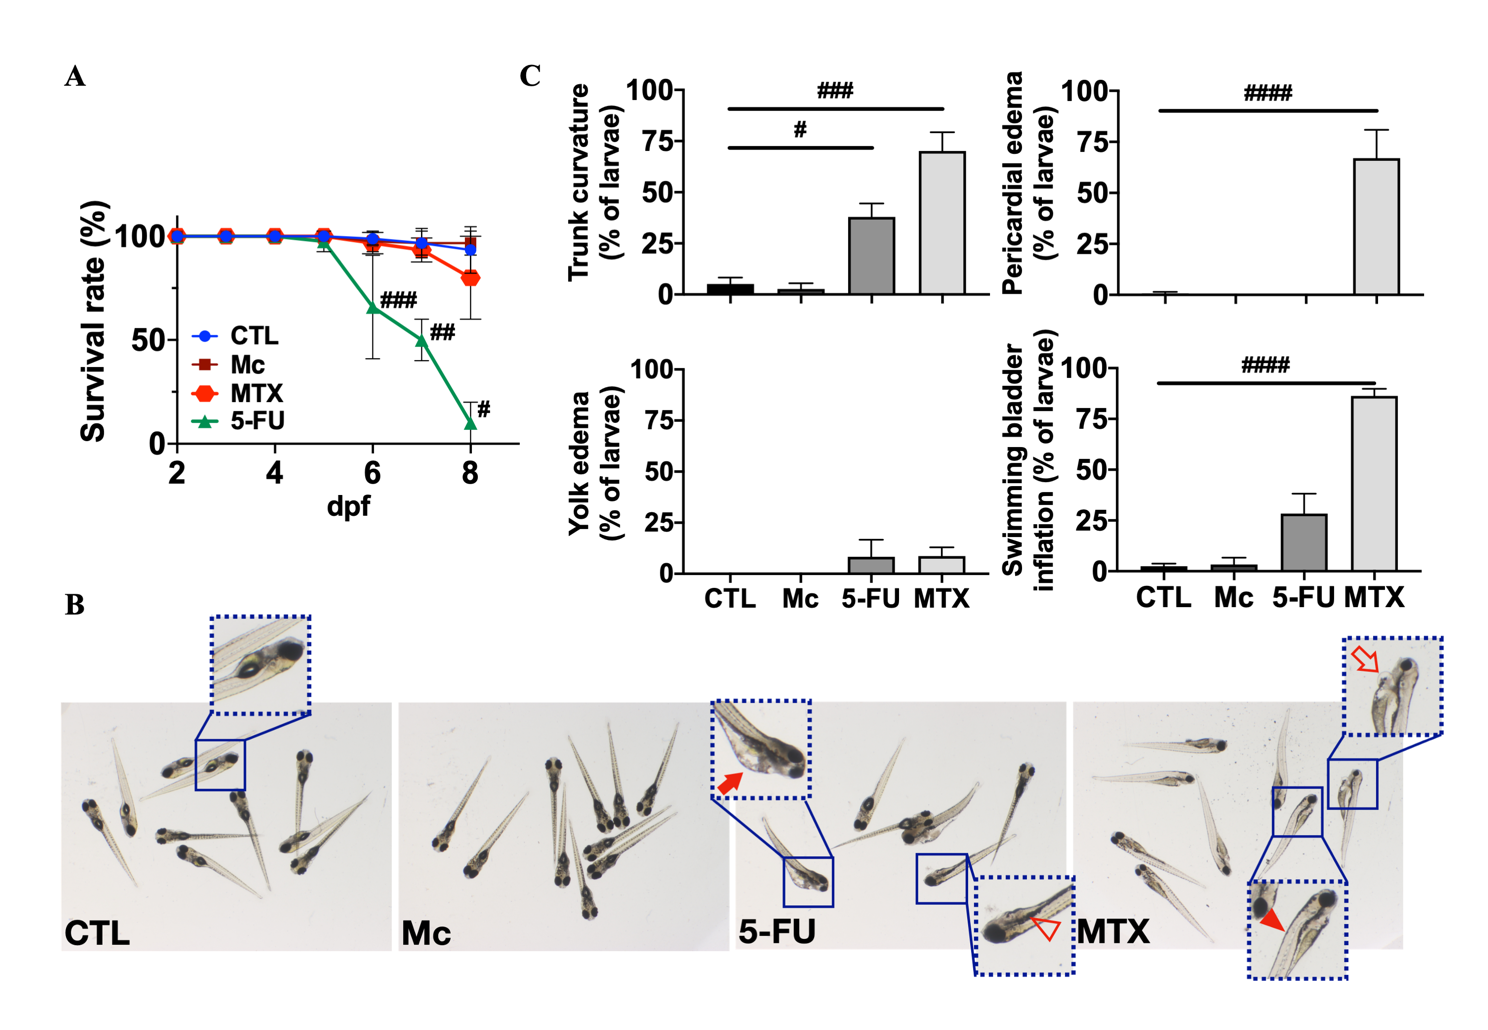
 **Figure S3**

**M. chinensis exhibits the lowest embryonic toxicity among the tested compounds targeting the thymidylate cycle.**

**A.** Larvae were exposed to *M. chinensis* (0.9 mg/ml), 5-fluorouracil (0.65 mg/ml), and methotrexate (0.68 mg/ml) at 2 dpf, and their survival rate was recorded daily. **B-C.** Morphological characteristics, including body curvature, yolk edema, loss of inflated swim bladder, and pericardial edema, were assessed at 6 dpf. All data represent the mean ± SEM of at least three independent trials with 15 embryos per group. Statistical significance was calculated using two-way ANOVA followed by the Kruskal-Wallis test.#, p < 0.05; ###, p < 0.001; ####, p < 0.0001.

**
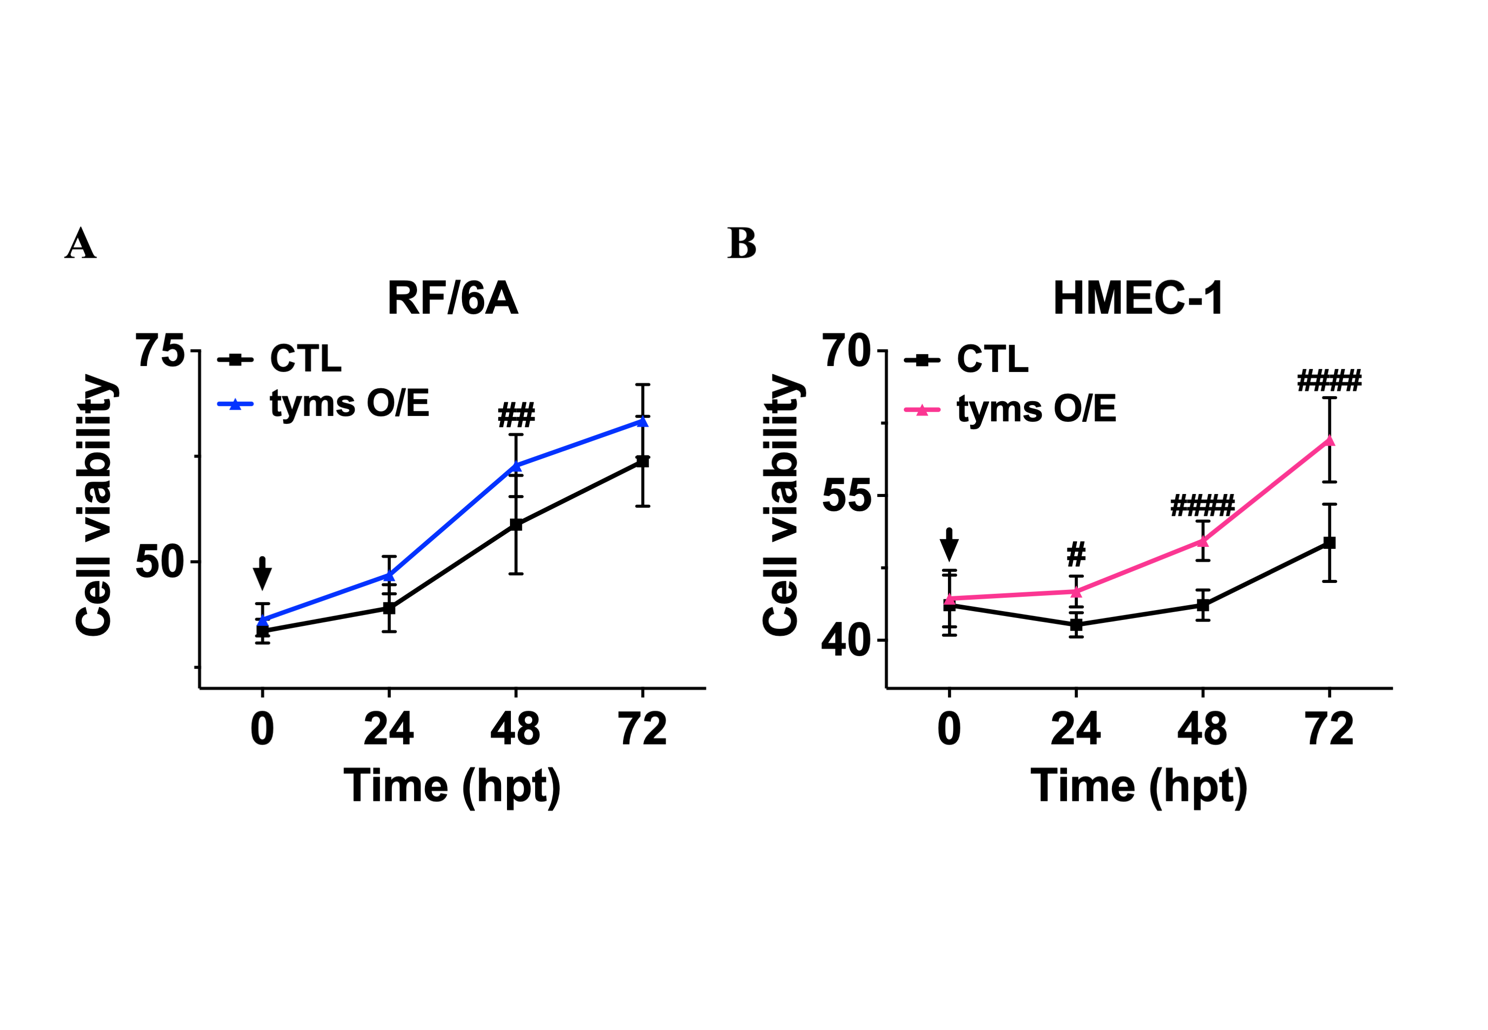
**

**Figure S4**

**The intracellular TYMS overexpression promotes endothelial cell proliferation.**

**A-B.** Plasmid DNA encoding the mcherry-zTYMS fusion protein was transfected into RF/6A and HMEC-1 cells via Lipofectamine 3000. Cell viability was assessed at 0, 24, 48, and 72 h post-transfection using the Alamar blue assay. Statistical significance was calculated by two-way ANOVA with Sidak’s multiple comparisons test. Data represent the average of at least three independent trials. #, p < 0.05; ##, p < 0.01; ####, p < 0.0001.

| **Name** | **Sequences (5’ to 3’)** | **Name** | **Sequences (5’ to 3’)** |
| --- | --- | --- | --- |
| **ztyms (F)** | **AAGCTTCTATGCCCGACACGGCAGT** | **zfdh1 (F)** | **GGTCTTTGGTTGGTCAGCG** |
| **ztyms (R)** | **GGATCCCTAAACAGCCATTTGCATTTTG** | **zfdh1 (R)** | **TGCCCATTCTGACTGCCTT** |
| **zmtr (F)** | **CGGACCACTCGGAGAAACT** | **zmthfd1b (F)** | **TCTCCCAGAGGCCCAACA** |
| **zmtr (R)** | **GCGTAATCCTCCACCTGCT** | **zmthfd1b (R)** | **GCCAACAAGCGGGTAGAGG** |
| **zmthfd1l (F)** | **GAAGGTTTACGGCGCTGA** | **vegfaa (F)** | **TGCAGATGTGAAAAGCCAAG** |
| **zmthfd1l (R)** | **ACGTCTCTGATGGGCAGG** | **vegfaa (R)** | **AAGCAGCGTCTTCGTTGACT** |
| **zshmt1 (F)** | **GGAGAGTCTGATTAATCAGGC** | **vegfab (F)** | **CGTCCTCGGGAAATGTTG** |
| **zshmt1 (R)** | **CATTTTGAGCCAGTTCCTCC** | **vegfab (R)** | **TTTCATCCGACACTGGCAT** |
| **zdhfr (F)** | **CAGAAGATGACCATGACCCCTTCAG** | **vegfr2 (F)** | **AGCAGGAGGGAAAGCACTAC** |
| **zdhfr (R)** | **GCTTGAGGATGCGGGTTACAAAC** | **vegfr2 (R)** | **GAGACAGAATGAGACAGAATGGA** |
| **zmthfr (F)** | **GCTTTCGCGTTGTGGATT** | **actb2 (F)** | **GCAGAAGGAGATCACATCCCTGGC** |
| **zmthfr (R)** | **GTCCAGGAGCGCAAACAT** | **actb2 (R)** | **CATTGCCGTCACCTTCACCGTCC** |

**Table S1**

Primers used for RT-PCR
